# Supplementary material for: An UNC-40 pathway directs postsynaptic membrane extension in Caenorhabditis elegans
Source: Oxford University Press journal article supplement (doi:10.1242/dev.030759), 2009-02-11
Supplement: dev030759-table2.pdf [file dev030759-table2.pdf]

**Table S2. Genetic interactions of *unc-40* and members of the WAVE complex in directing HSN axon outgrowth, but not guidance to the midline**

|    | Genotype <sup>†</sup>                                | HSNl axon outgrowth defects <sup>‡</sup> | HSNr axon outgrowth defects <sup>‡</sup> | HSNl axon guidance defects <sup>§</sup> | HSNr axon guidance defects <sup>§</sup> |
|----|------------------------------------------------------|------------------------------------------|------------------------------------------|-----------------------------------------|-----------------------------------------|
| 1  | <i>negative control</i>                              | 2.0±1.2                                  | 4.0±1.2                                  | 0.0±0.0                                 | 1.3±1.3                                 |
| 2  | <i>negative control(RNAi)</i>                        | 4.0±1.2 (0.1, 1)                         | 3.3±0.7 (0.3, 1)                         | 0.0±0.0                                 | 0.7±0.7 (0.3, 1)                        |
| 3  | <i>*negative control</i>                             | 1.3±1.3                                  | 1.3±0.7                                  | 1.3±1.3                                 | 1.3±0.7                                 |
| 4  | <i>*unc-40(n324)</i>                                 | 59±9.4 (<0.01, 3)                        | 66.0±1.2 (<0.001, 3)                     | 50.7±7.8 (0.0017, 3)                    | 56.0±3.1 (<0.001, 3)                    |
| 5  | <i>unc-40(n324)</i>                                  | 76.7±3.3 (<0.001, 1)                     | 74.7±4.7 (<0.001, 1)                     | 70.7±4.1 (<0.001, 1)                    | 63.3±3.5 (<0.001, 1)                    |
| 6  | <i>unc-40(n324); negative control(RNAi)</i>          | 77.6±3.9 (<0.001, 2)                     | 77.9±1.2 (<0.001, 2)                     | 63.3±3.3 (<0.001, 2)                    | 67.7±2.3 (<0.001, 2)                    |
| 7  | <i>gex-2(ok1603)</i>                                 | 18.9±2.8 (<0.01, 1)                      | 18.9±1.1 (<0.001, 1)                     | 6.6±3.3 (0.06, 1)                       | 1.1±1.1 (0.45, 1)                       |
| 8  | <i>gex-2(ok1603); Ex[unc-86p::GEX-2::YFP] line 1</i> | 7.8±1.1 (0.01, 7)                        | 6.7±1.9 (<0.01, 7)                       | –                                       | –                                       |
| 9  | <i>gex-2(ok1603); Ex[unc-86p::GEX-2::YFP] line 2</i> | 4.8±1.0 (<0.01, 7)                       | 3.7±0.3 (<0.001, 7)                      | –                                       | –                                       |
| 10 | <i>*gex-3(zu196)</i>                                 | 11.7±0.5 (<0.01, 3)                      | 11.7±0.5 (<0.001, 3)                     | 0.0±0.0 (0.25, 1)                       | 0.0±0.0 (0.11, 1)                       |
| 11 | <i>gex-3(RNAi)</i>                                   | 11.1±4.0 (0.08, 2)                       | 12.2±2.9 (0.02, 2)                       | 0.0±0                                   | 0.0±0.0 (0.2, 2)                        |
| 12 | <i>wve-1(RNAi)</i>                                   | 12.7±3.3 (0.03, 2)                       | 12.9±4.6 (0.06, 2)                       | 0.0±0                                   | 0.0±0.0 (0.18, 2)                       |
| 13 | <i>unc-40(n324); gex-2(ok1603)</i>                   | 65.7±5.7 (0.09, 5)                       | 70.0±5.1 (0.3, 5)                        | 56.7±5.3 (0.05, 5)                      | 63.4±7.0 (0.49, 5)                      |
| 14 | <i>unc-40(n324); gex-3(RNAi)</i>                     | 74.7±2.3 (0.3, 6)                        | 73.0±3.1 (0.1, 6)                        | 64.7±4.7 (0.41, 6)                      | 62.7± 6.8 (0.26, 6)                     |
| 15 | <i>*unc-40(n324); gex-3(zu196)</i>                   | 90 ( <i>n</i> =1×10)                     | 80 ( <i>n</i> =1×10)                     | 80 ( <i>n</i> =1×10)                    | 60 ( <i>n</i> =1×10)                    |
| 16 | <i>unc-40(n324); wve-1(RNAi)</i>                     | 71.1±2.9 (0.12, 6)                       | 73.3±0 (<0.01, 6)                        | 70.2±8.6 (0.25, 6)                      | 71.1±4.8 (0.28, 6)                      |

The HSN cell bodies and axons of young adults were visualized with *zdl13[tph-1::GFP] IV* (a gift from Oliver Hobert), except for those genotypes marked with an asterisk that were visualized with *mgIs42[tph-1::GFP + pRF4(rol-6(su1006))]*. Unless otherwise indicated, 30 animals were counted in three separate trials. All counts made at 20°C.

<sup>†</sup>The percentage of HSNs extending an axon in a direction other than ventral for more than two cell diameters away from the cell body. Standard error of the mean follows the mean, followed by a *P*-value relative to the data in the indicated row. *P*-values were calculated using a *t*-test.

<sup>§</sup>The percentage of HSN axons that fail to ever extend ventrally. The annotation is the same as indicated above
